# MIND TO MIND

*Creative writing that explores the abstract side  
of our profession and our lives*

*Stephen T. Harvey, M.D., Editor*

## The Trip

Gary R. Strichartz, Ph.D., M.Div.

N

Nursing the gentle curve of afternoon,  
She lets the road guide her through reverie.  
How many times has she passed through these woods,  
These hills, imprinted firm in memory?

Today felt like the same familiar rite  
Toward home, home's safety, home's security.  
But thoughts were intercepted in mid-flight,  
Jarred by today's misguided move  
That slipped from practice common and well-proved.

Sliding the gentle curve of new shaved skin  
Between her fingers firm and scalpel keen,  
She cut through flesh, opened a deep path down  
Into the tumor dark, its root unseen.

The blade dug deep, then tripped,  
Entangled by the plume of red mistake  
As if blood's river lay within the break.  
Hands rushed to close the broken artery.  
Blood swelled, pulsed out in fury that the ache anticipates,  
Then stopped.  
Flow stemmed,  
Aborted operation barely saved.

---

From Brigham and Women's Hospital, Harvard Medical School, Boston, Massachusetts. gstrichartz@bwh.harvard.edu  
Accepted for publication July 21, 2017.

Permission to reprint granted to the American Society of Anesthesiologists, Inc., and Wolters Kluwer Health, Inc., by copyright author/owner.  
Anesthesiology 2017; 127:1035-6

Life's liquid was alone not lost today.  
Her confidence was also washed away.  
The sutures closed by unfamiliar hands.  
Revealing doubts that before had no sway  
Now shake an ego on which courage stands.

Soft sun sends shimmers through the sharpened swirl  
Of scarlet leaves that clamor and unfurl  
As she drives by the turn to comfort's place,  
Seeking a way to warm her bone-deep chill,  
Drawn by the call of the transcendent grace  
That saves the heart and guides the hands that heal.
